# Supplementary material for: Endogenous omega-3 long-chain fatty acid biosynthesis from alpha-linolenic acid is affected by substrate levels, gene expression, and product inhibition
Source: Royal Society of Chemistry journal article supplement (doi:10.1039/c7ra06728c), 2017-01-01
Supplement: c7ra06728c1.pdf [file c7ra06728c1.pdf]

Table S1 Diet Ingredients

| Ingredient                    | Diet Group (g/100g Dry Weight) |              |            |              |
|-------------------------------|--------------------------------|--------------|------------|--------------|
|                               | ALA-1 diet                     | ALA-2.5 diet | ALA-5 diet | ALA-7.5 diet |
| <b>Variable diet fat</b>      |                                |              |            |              |
| Palm Oil                      | 8.90                           | 6.95         | 3.71       | 0.47         |
| Safflower Oil                 | 0                              | 0            | 0          | 0            |
| Olive Oil                     | 2.45                           | 1.92         | 1.02       | 0.13         |
| Flaxseed Oil <sup>1</sup>     | 1.65                           | 4.13         | 8.26       | 12.40        |
| EPA Oil <sup>2</sup>          | 0                              | 0            | 0          | 0            |
| <b>Fixed diet ingredients</b> |                                |              |            |              |
| Wheat Fl                      |                                |              | 30         |              |
| Dextrin                       |                                |              | 10         |              |
| Sucrose                       |                                |              | 10         |              |
| Casein                        |                                |              | 10         |              |
| Lactalbumin                   |                                |              | 10         |              |
| Alphacel                      |                                |              | 11         |              |
| $\beta$ -Sitosterol           |                                |              | 0.015      |              |
| Mineral Mix <sup>3</sup>      |                                |              | 4.7        |              |
| Vitamin Mix <sup>4</sup>      |                                |              | 1          |              |
| Choline Bitartrate            |                                |              | 0.25       |              |
| Tenox 20A                     |                                |              | 0.006      |              |
| Carbohydrates/% Calories      |                                |              | 46.7/47.1  |              |

Protein/% Calories 23.2/23.4

Fat/% Calories 13/29.5

---

1. Omega-3 H<sup>TM</sup> EPA: 70% EPA & 10% DHA from Huatai Biopharm Inc. (<http://www.huatai-biopharm.com/>).

2 ALA oil: 65% ALA from News agency merchant natural flavor oil refinery (<https://yikangxl.1688.com/>)

3. AIN-93M; TD94049.

4. AIN-93; TD 94047.

Table S2 Diet Ingredients

| Ingredient                    | Diet Group (g/100g Dry Weight) |         |       |      |      |
|-------------------------------|--------------------------------|---------|-------|------|------|
|                               | 0.25E+5A                       | 0.5E+5A | 1E+5A | EPA  | Ctl  |
|                               | diet                           | diet    | diet  | diet | diet |
| <b>Variable diet fat</b>      |                                |         |       |      |      |
| Palm Oil                      | 3.45                           | 3.20    | 2.68  | 7.06 | 6.50 |
| Safflower Oil                 | 0                              | 0       | 0     | 0.47 | 0    |
| Olive Oil                     | 0.95                           | 0.88    | 0.74  | 2.83 | 6.50 |
| Flaxseed Oil <sup>1</sup>     | 8.26                           | 8.26    | 8.26  | 0    | 0    |
| EPA Oil <sup>2</sup>          | 0.33                           | 0.66    | 1.32  | 2.64 | 0    |
| <b>Fixed diet ingredients</b> |                                |         |       |      |      |
| Wheat Fl                      |                                |         | 30    |      |      |
| Dextrin                       |                                |         | 10    |      |      |
| Sucrose                       |                                |         | 10    |      |      |
| Casein                        |                                |         | 10    |      |      |
| Lactalbumin                   |                                |         | 10    |      |      |
| Alphacel                      |                                |         | 11    |      |      |
| $\beta$ -Sitosterol           |                                |         | 0.015 |      |      |
| Mineral Mix <sup>3</sup>      |                                |         | 4.7   |      |      |
| Vitamin Mix <sup>4</sup>      |                                |         | 1     |      |      |
| Choline Bitartrate            |                                |         | 0.25  |      |      |
| Tenox 20A                     |                                |         | 0.006 |      |      |

Carbohydrates/% Calories 46.7/47.1

Protein/% Calories 23.2/23.4

Fat/% Calories 13/29.5

---

1. Omega-3 H<sup>TM</sup> EPA: 70% EPA & 10% DHA from Huatai Biopharm Inc. (<http://www.huatai-biopharm.com/>).

2 ALA oil: 65% ALA from News agency merchant natural flavor oil refinery (<https://yikangxl.1688.com/>)

3. AIN-93M; TD94049.

4. AIN-93; TD 94047.

Table S3 Fatty acid composition (%) of ALA diets

| Fatty acids | Ctl diet   | A-1 diet   | A-2.5 diet | A-5 diet   | A-7.5 diet |
|-------------|------------|------------|------------|------------|------------|
| FA/TFA (%)  |            |            |            |            |            |
| C14:0       | 1.47±0.01  | 1.55±0.38  | 1.78±0.12  | 1.50±0.27  | 0.96±0.06  |
| C16:0       | 29.06±1.25 | 30.23±0.32 | 27.47±0.35 | 19.61±0.57 | 16.07±0.12 |
| C18:0       | 5.54±0.19  | 4.95±0.39  | 5.90±0.37  | 4.75±0.02  | 4.16±0.22  |
| C18:1       | 56.33±0.51 | 44.88±0.53 | 39.15±1.61 | 30.18±0.47 | 20.71±0.31 |
| C18:2       | 7.31±0.11  | 12.24±0.04 | 11.49±0.30 | 12.86±0.42 | 12.95±0.44 |
| C18:3 ALA   | 0.00±0.00  | 6.13±0.04  | 14.23±1.31 | 31.11±0.33 | 45.17±1.03 |

Table S4 Fatty acid composition (%) of diets

| Fatty acids | 2 E        | 0.25E+5A   | 0.5E+5A    | 1E+5A      | A-5        |
|-------------|------------|------------|------------|------------|------------|
| C14:0       | 1.35±0.08  | 1.10±0.01  | 1.06±0.01  | 0.97±0.05  | 1.50±0.27  |
| C15:0       | 0.19±0.05  | 0.18±0.03  | 0.16±0.01  | 0.12±0.01  | ND         |
| C16:0       | 26.42±0.22 | 16.95±0.15 | 16.82±0.28 | 15.03±0.31 | 19.61±0.57 |
| C16:1       | 0.36±0.01  | 0.22±0.01  | 0.26±0.01  | 0.21±0.03  | ND         |
| C17:0       | 0.26±0.01  | 0.21±0.10  | 0.13±0.01  | 0.14±0.00  | ND         |
| C18:0       | 4.37±0.10  | 4.26±0.06  | 4.19±0.05  | 4.08±0.01  | 4.75±0.02  |
| C18:1       | 43.20±0.11 | 27.64±0.12 | 27.65±0.15 | 26.04±0.24 | 30.18±0.96 |
| C18:2       | 10.79±0.01 | 12.44±0.04 | 12.23±0.19 | 12.24±0.04 | 12.86±0.42 |
| C18:3 ALA   | 0.51±0.21  | 33.89±0.02 | 33.66±0.21 | 33.75±0.18 | 31.11±0.33 |
| C20:0       | 0.30±0.04  | 0.51±0.02  | 0.47±0.04  | 0.48±0.12  | ND         |
| C20:1       | 0.27±0.02  | ND         | 0.19±0.04  | 0.16±0.01  | ND         |
| C20:4 n-6   | 0.55±0.01  | ND         | 0.24±0.06  | 0.30±0.01  | ND         |
| C20:4 n-3   | 0.42±0.08  | 0.06±0.01  | 0.12±0.01  | 0.18±0.03  | ND         |
| C20:5 EPA   | 10.07±0.15 | 1.25±0.35  | 2.57±0.06  | 5.37±0.10  | ND         |
| C22:0       | ND         | 0.10±0.05  | 0.12±0.01  | 0.15±0.04  | ND         |
| C22:5 n-6   | ND         | ND         | ND         | ND         | ND         |
| C22:5 n-3   | 0.25±0.01  | ND         | ND         | 0.20±0.03  | ND         |
| C22:6 DHA   | 0.99±0.03  | 0.15±0.10  | 0.29±0.00  | 0.62±0.02  | ND         |

ND: no detected.

Table S5 Primer sequences used for RT-PCR

| mRNA            | Sense primer sequence   | Antisense primer sequence |
|-----------------|-------------------------|---------------------------|
| <i>GAPDH</i>    | AGGTCGGTGTGAACGGATTTG   | TGTAGACCATGTAGTTGAGGTCA   |
| <i>Fads2</i>    | GACATAAAGAGCCTGCATGTGTT | GGGCAGGTATTCAGCTTCTTC     |
|                 | T                       |                           |
| <i>Elovl5</i>   | GGTGTGTGGGAAGGCAAATAC   | TGCGAAGGATGAAGAAAAAGG     |
| <i>Hsd17b12</i> | ATGCTCCCAGTTCCATTGTT    | CTTATCCAAAGTCGGCTTCTGTA   |
| <i>Hacd4</i>    | CTATTGGGTTAGTTATGCGGGTT | CATTTCTCTTGGACCTCCTCTTGA  |
| <i>Hacd3</i>    | CCCAGAGTGGATTGGCATT     | ATCAGTGAGGGAACACCAGAAG    |
| <i>Hacd2</i>    | GCTGCTTGTC AATAGCCCTG   | CACAATCTAACTTGGTCCTGG     |
| <i>Tecr</i>     | ATCAACCACCCTCTCTACACACC | ACAGGACACCAACAGGAACAGC    |
| <i>Pecr</i>     | ACACTGGAGCGGCAAGAGAA    | TGTCCCATTTCGCCATAGTTG     |
| <i>Fads1</i>    | TGGTGCCCTTCATCCTCTGT    | TGATGTGCTGCTGCGAGA        |





Table S6 Body weight of five groups during test.

|             | 0 w        | 1 w        | 2 w        | 3 w        | 4 w        | 5 w        | 6 w        | 7 w        |
|-------------|------------|------------|------------|------------|------------|------------|------------|------------|
| Ctl group   | 20.9±0.39  | 22.19±0.58 | 24.4±0.7   | 25.96±0.56 | 26.68±0.64 | 27.91±0.65 | 28.8±0.55  | 29.56±0.56 |
| A-1 group   | 20.91±0.43 | 21.96±0.47 | 24.02±0.51 | 25.38±0.77 | 26.63±0.77 | 28.08±0.8  | 29.5±1.06  | 31.33±1.32 |
| A-2.5 group | 20.88±0.23 | 22.03±0.35 | 23.74±0.55 | 25.85±0.38 | 26.52±0.47 | 27.97±0.61 | 29.24±0.73 | 29.67±0.72 |
| A-5 group   | 20.26±0.22 | 21.63±0.23 | 23.91±0.3  | 25.41±0.46 | 26.63±0.44 | 27.57±0.37 | 28.51±0.47 | 29.6±0.38  |
| A-7.5 group | 20.41±0.16 | 21.81±0.26 | 24.63±0.36 | 25.11±0.57 | 26.64±0.58 | 27.43±0.58 | 28.31±0.63 | 29.46±0.62 |

As shown in Table S6, the body weight of all groups were increased during test, but there were no significant differences among the groups at the same time ( $P > 0.05$ ). Therefore, supplementation of different amount of ALA in diets did not affect body weight.

## Figures

Fig. S1 Hacd 3, Hacd 4, Pecn, Tecd, and Hsd17b12 mRNA in liver of different ALA levels groups

Animals were fed with different ALA content diet and mRNA was isolated in liver and measured by Fluorescence quantitative PCR (qPCR) method. The expression of Hacd 3, Hacd 4, Pecn, Tecd, and Hsd17b12 were kept in a stable level from the ALA percent of 1% to 5%, but relatively high levels at the ALA percent of 7.5%. Bars labeled with different letters are significantly different from each other ( $P < 0.05$ ).

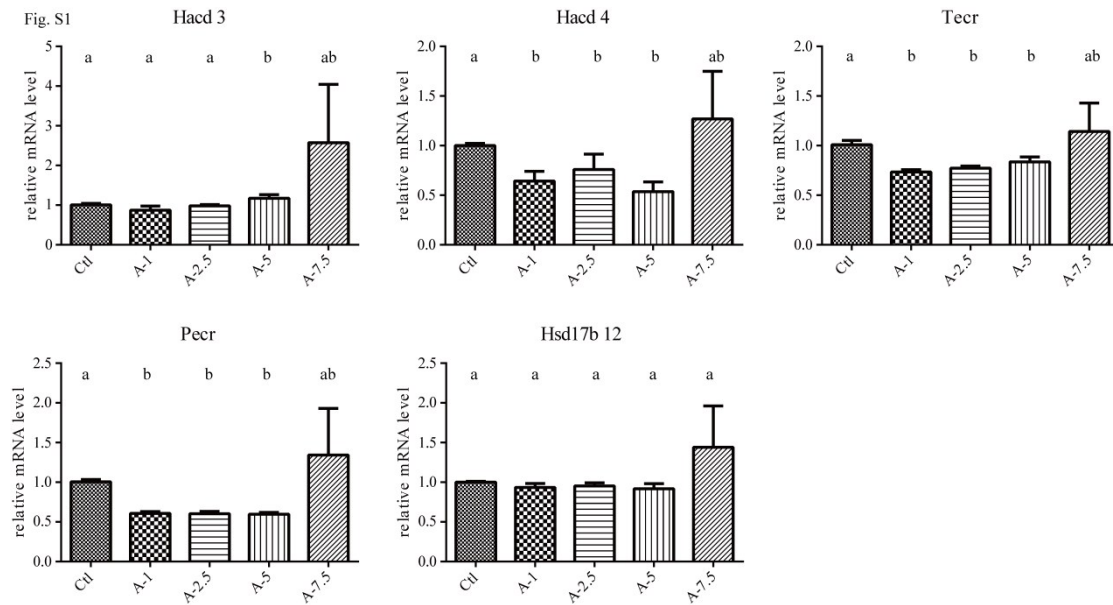

Fig. S2 Hacd 3, Hacd 4, Pecn, Tecd and Hsd17b12 mRNA in liver of different EPA levels groups

Animals were fed with different amount of EPA plus 5% ALA diet and mRNA was isolated from liver and measured by Fluorescence quantitative PCR (qPCR) method. The expression of Hacd 3, Hacd 4, Pecn, Tecd and Hsd17b12 were shown for different groups. Bars labeled with different letters are significantly different from each other ( $P < 0.05$ ).

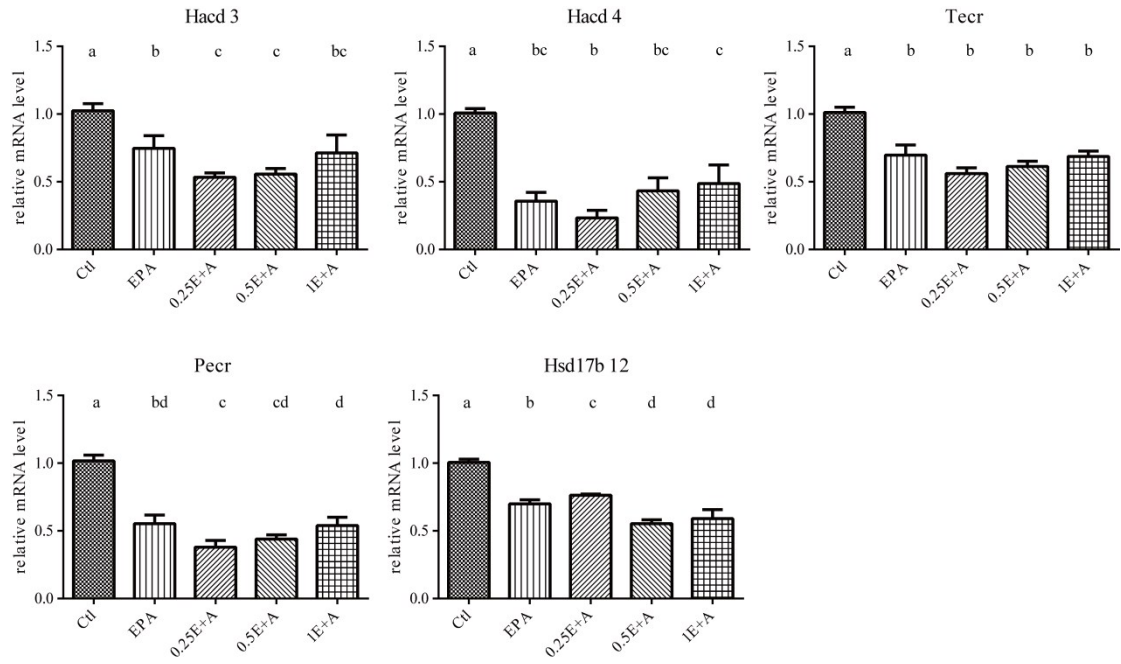

Fig. S3 Food intake of five groups during the experiment.

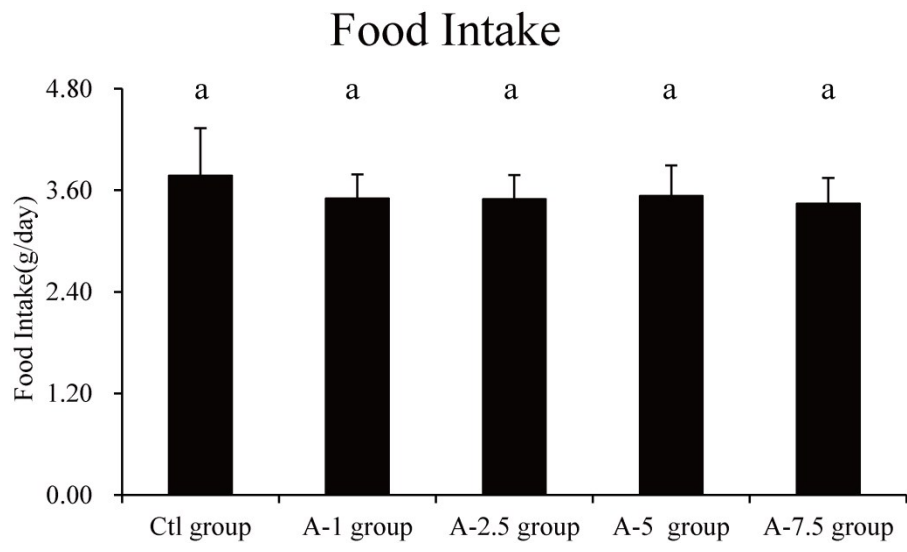

During the 7 weeks, there were no significant difference among the groups ( $P > 0.05$ ). ALA supplementation did not change the food intake of different groups mice. Bars labeled with different letters are significantly different from each other ( $P < 0.05$ ).
